# Supplementary material
Source: Springer Nature journal article supplement (https://www.springermedizin.de/resource/supplementary/12879_2005_326_MOESM2_ESM.pdf/9448786)

### **Amplification Curves**

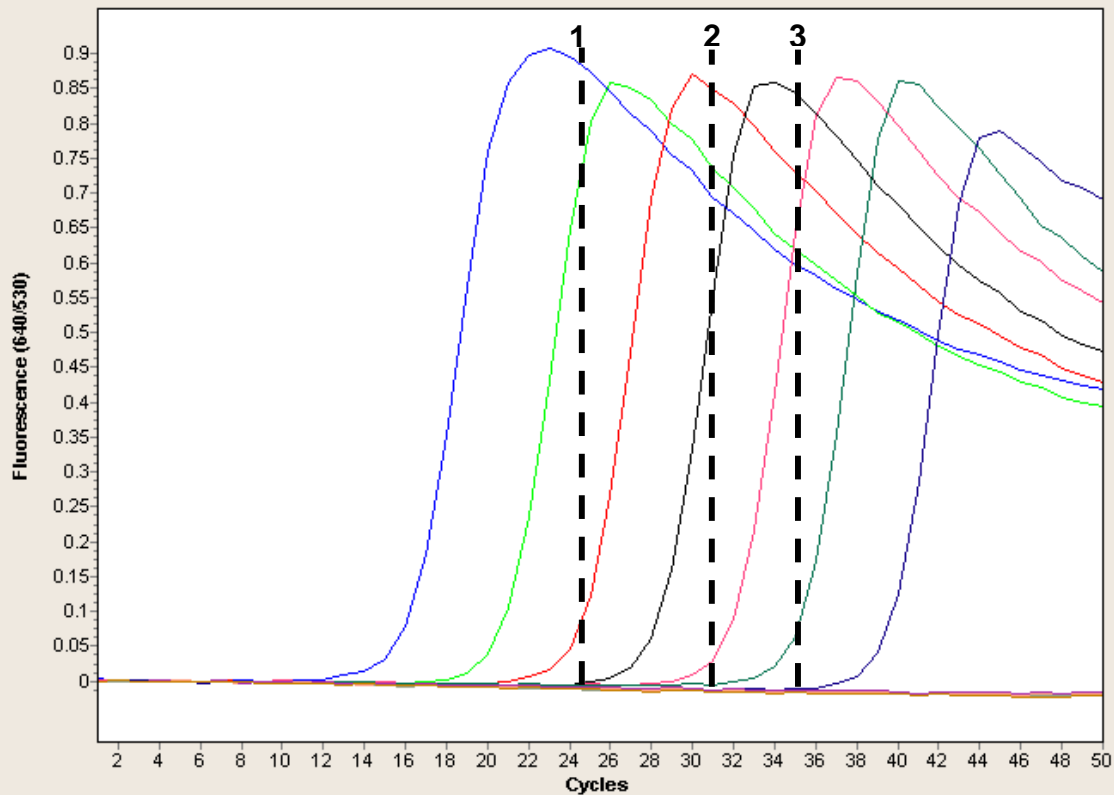

Supplement: MOESM2 [file 9448786]
